# Supplementary material for: Hyperoside inhibits pancreatic lipase activity in vitro and reduces fat accumulation in vivo
Source: Royal Society of Chemistry journal article supplement (doi:10.1039/d2fo03219h), 2023-01-01
Supplement: d2fo03219h1.pdf [file d2fo03219h1.pdf]

1 **Supplementary Information**

2

3 **Table. S1** Ingredients and composition of NCD and HFD

| Ingredient (g/kg)                  | NCD      | HFD      |
|------------------------------------|----------|----------|
| Casein                             | 200      | 200      |
| Sucrose                            | 50       | 50       |
| Corn starch                        | 639      | 477.5    |
| Mineral mix                        | 35       | 35       |
| Vitamin mix                        | 15       | 15       |
| DL-Methionine                      | 1        | 1        |
| Cholesterol                        | 0        | 1.5      |
| Gelatin                            | 20       | 20       |
| Lard                               | 40       | 200      |
| Carbohydrate (g/kg)                | 578.15   | 440.88   |
| Total energy from carbohydrate (%) | 66.29%   | 40.34%   |
| Protein (g/kg)                     | 197.19   | 195.25   |
| Total energy from protein (%)      | 22.61%   | 17.86%   |
| Fat (g/kg)                         | 43.02    | 203.02   |
| Total energy from fat (%)          | 11.10%   | 41.80%   |
| Total energy (kJ/kg)               | 14596.02 | 18291.11 |

4

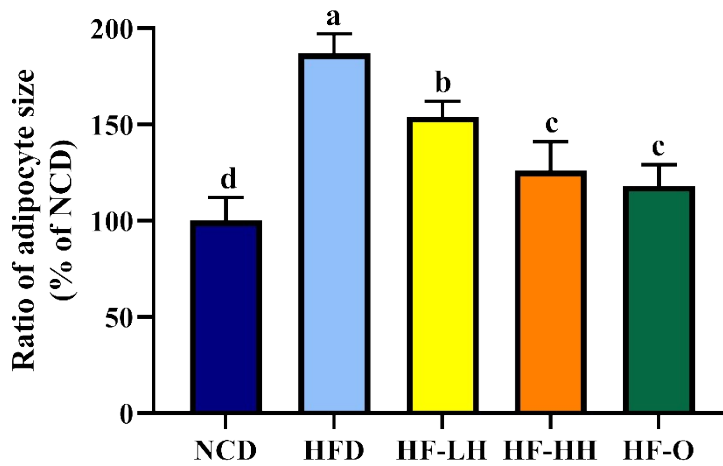

5

6 **Fig. S1** Quantitatively analyze the ratio of adipocyte size. Values are expressed as mean  
 7  $\pm$  SD and different letters indicate significant differences ( $p < 0.05$ ).

8

9

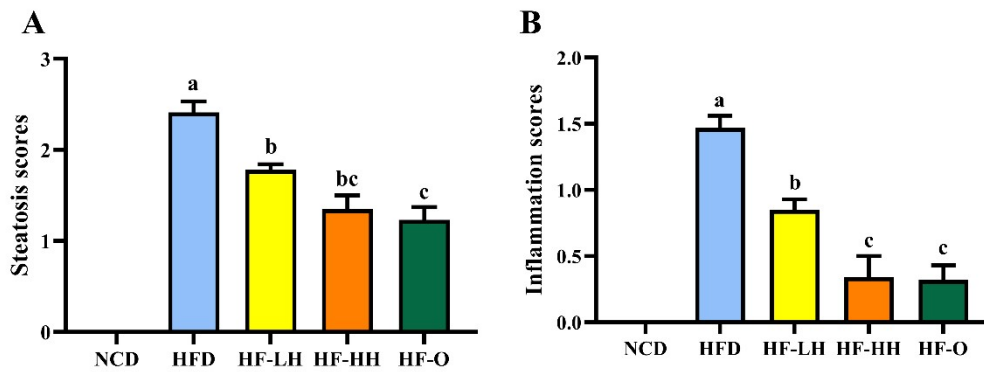

10

11 **Fig. S2** Liver histopathological score: hepatocyte steatosis score (A) and inflammation  
 12 score (B). Values are expressed as mean  $\pm$  SD and different letters indicate significant  
 13 differences ( $p < 0.05$ ).

14
